# Supplementary material for: Nonameric structures of the cytoplasmic domain of FlhA and SctV in the context of the full-length protein
Source: PubMed Central journal article supplement (PMC8213127; doi:10.1371/journal.pone.0252800), 2021-06-18

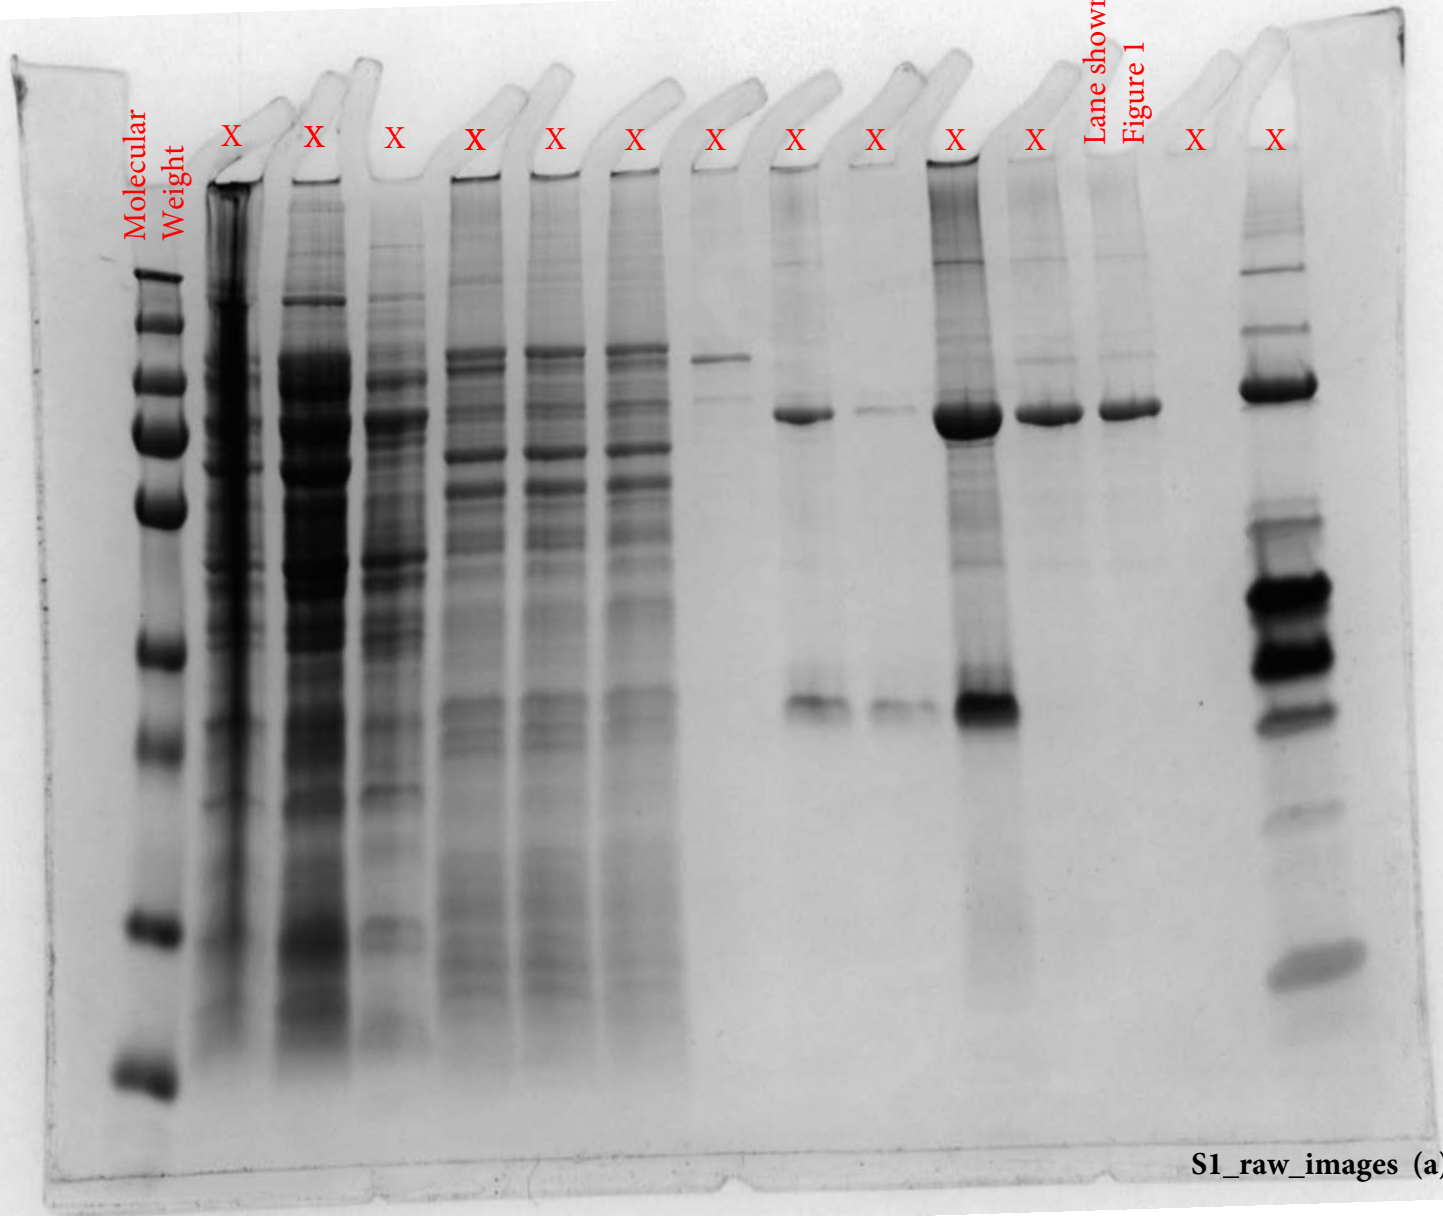

Molecular Weight

X

X

X

X

X

X

X

X

X

X

lane shown in figure 1

X

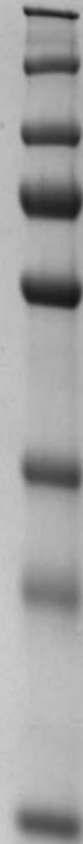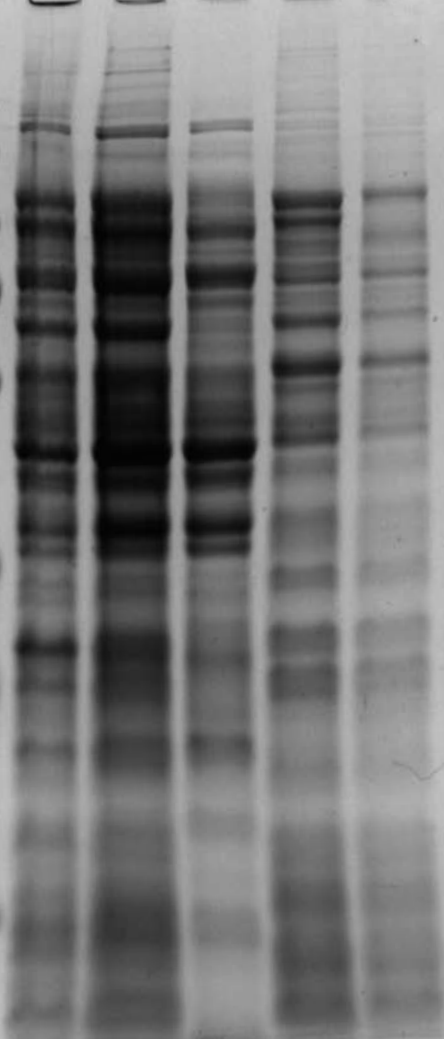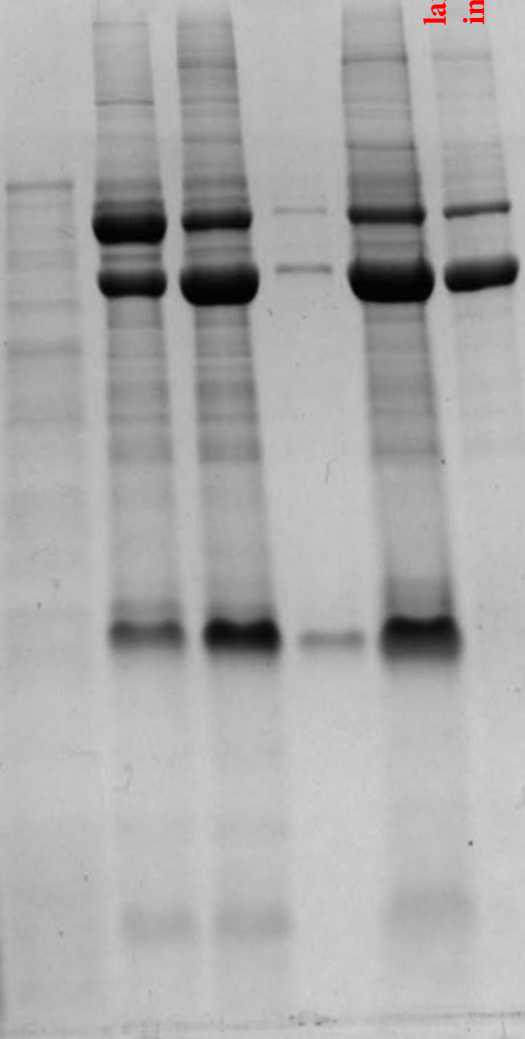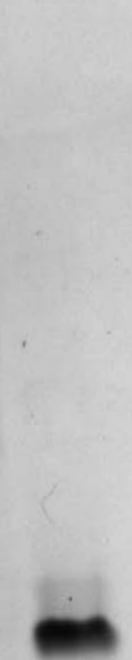

Supplement: pone.0252800.s001.pdf [file pone.0252800.s001.pdf]
